# Supplementary material for: KCTD15 Protein Expression in Peripheral Blood and Acute Myeloid Leukemia
Source: PubMed Central journal article supplement (PMC7345863; doi:10.3390/diagnostics10060371), 2020-06-04
Supplement: diagnostics-10-00371-s001.pdf [file diagnostics-10-00371-s001.pdf]

**Supplementary Table 1.** KCTD15 intensity of expression (mean +/- SD) in circulating lymphocytes, monocytes and granulocytes.

| Background  |           | Lymphocytes |           | Monocytes   |           | Granulocytes |           |
|-------------|-----------|-------------|-----------|-------------|-----------|--------------|-----------|
| <u>Mean</u> | <u>SD</u> | <u>Mean</u> | <u>SD</u> | <u>Mean</u> | <u>SD</u> | <u>Mean</u>  | <u>SD</u> |
| 4089        | ±1814     | 7672        | ±7574     | 21157       | ±3772     | 46306        | ±11656    |
| 4089        | ±1814     | 5728        | ±3299     | 23754       | ±6242     | 46720        | ±14884    |
| 4089        | ±1814     | 8188        | ±2317     | 18221       | ±4095     | 44471        | ±11118    |
| 4089        | ±1814     | 2804        | ±3540     | 15730       | ±5098     | 37465        | ±9419     |
| 4089        | ±1814     | 9001        | ±3692     | 17353       | ±5338     | 39719        | ±7172     |
| 4089        | ±1814     | 6057        | ±2978     | 12448       | ±3710     | 15588        | ±5517     |
| 4089        | ±1814     | 6647        | ±4407     | 18097       | ±6031     | 49330        | ±17893    |
| 4089        | ±1814     | 7419        | ±2971     | 15941       | ±6129     | 25932        | ±13305    |
| 4089        | ±1814     | 7194        | ±4336     | 16796       | ±9522     | 51458        | ±20572    |
| 4089        | ±1814     | 6303        | ±4544     | 19205       | ±6559     | 37803        | ±10339    |
| 4089        | ±1814     | 7670        | ±3523     | 15097       | ±6453     | 40114        | ±17322    |
| 4089        | ±1814     | 8109        | ±3384     | 16065       | ±6486     | 33762        | ±10946    |
| 4089        | ±1814     | 6735        | ±2420     | 14062       | ±5353     | 35094        | ±14334    |
| 4089        | ±1814     | 8897        | ±3317     | 17201       | ±6675     | 33431        | ±12748    |
